# Supplementary material for: The inhibitory effects of a new cobalt-based polyoxometalate on the growth of human cancer cells
Source: Royal Society of Chemistry journal article supplement (doi:10.1039/c3dt53030b), 2013-12-04
Supplement: c3dt53030b.pdf [file c3dt53030b.pdf]

**Supporting Information:**

**Inhibitory Effects of New Cobalt-Based Polyoxometalates on Growth of Human Cancer Cells\*\***

Lu Wang<sup>1,2</sup>, Kai Yu<sup>1</sup>, Bai-Bin Zhou<sup>1,\*,#</sup>, Zhan-Hua Su<sup>1</sup>, Song Gao<sup>1</sup>, Li-Li Chu<sup>1</sup>, Jia-Ren Liu<sup>3,\*</sup>

*1 Key Laboratory of Synthesis of Functional Materials and Green Catalysis Colleges of Heilongjiang Province, Department of Chemical Engineering, Harbin Normal University, Harbin, Heilongjiang 150025, the People's Republic of China, E-mail: zhou\_bai\_bin@163.com*

*2 Department of Biochemical Engineering, Harbin Institute of Technology, Harbin, Heilongjiang 150090, the People's Republic of China, E-mail: hitwanglu@hit.edu.cn*

*3 Boston Children's Hospital and Harvard Medical School, 300 Longwood Ave, Boston, Ma 02115-5737, E-mail: Jia-Ren.Liu@childrens.harvard.edu*

**Table S1** Crystal data and refinement parameters for Compound BWCN.

| Compound                                         | BWCN                                                                                                                           |
|--------------------------------------------------|--------------------------------------------------------------------------------------------------------------------------------|
| Empirical formula                                | H <sub>88</sub> Na <sub>4</sub> Bi <sub>2</sub> Co <sub>2</sub> W <sub>20</sub> O <sub>107</sub> C <sub>6</sub> N <sub>4</sub> |
| Formula weight                                   | 6152.74                                                                                                                        |
| Temperature, K                                   | 273                                                                                                                            |
| Crystal system                                   | triclinic                                                                                                                      |
| Space group                                      | P -1                                                                                                                           |
| a, Å                                             | 12.4832(5)                                                                                                                     |
| b, Å                                             | 13.6886(5)                                                                                                                     |
| c, Å                                             | 16.9954(6)                                                                                                                     |
| $\alpha$ , deg                                   | 69.4680(10)                                                                                                                    |
| $\beta$ , deg                                    | 83.0670(10)                                                                                                                    |
| $\gamma$ , deg                                   | 64.6840(10)                                                                                                                    |
| Volume, Å <sup>3</sup>                           | 2457.00(16)                                                                                                                    |
| Z                                                | 1                                                                                                                              |
| D <sub>calcd</sub> (g cm <sup>-3</sup> )         | 4.158                                                                                                                          |
| $\mu$ (Mo K $\alpha$ ), mm <sup>-1</sup>         | 27.339                                                                                                                         |
| F(000)                                           | 2672                                                                                                                           |
| Reflections collected/unique (R <sub>int</sub> ) | 17826 / 11657                                                                                                                  |
| GOF on F <sup>2</sup>                            | 1.035                                                                                                                          |
| Final R indices [I > 2 $\sigma$ (I)]             | R1 = 0.0533, wR2 = 0.1430                                                                                                      |
| R (all data)                                     | R1 = 0.0640, wR2 = 0.1512                                                                                                      |

(\* R<sub>1</sub> =  $\sum||F_o| - |F_c|| / \sum|F_o|$ , wR<sub>2</sub> =  $[\sum(w(F_o^2 - F_c^2)^2) / \sum(wF_o^2)^2]^{1/2}$ ).

**Table S2:** Selected bond lengths (Å ) and angles (deg) for Compound BWCN.

| bond and<br>bond angles | bond lengths (Å ) and<br>angles (deg) | bond and<br>bond angles | bond lengths (Å ) and<br>angles (deg) | bond and<br>bond angles | bond lengths (Å ) and<br>angles (deg) |
|-------------------------|---------------------------------------|-------------------------|---------------------------------------|-------------------------|---------------------------------------|
| W1-O25                  | 1.797(12)                             | W1-O37                  | 1.741(12)                             | W1-O38                  | 2.077(11)                             |
| W1-O40                  | 2.201(11)                             | W1-O44                  | 2.075(11)                             | W1-O18                  | 1.803(12)                             |
| W2-O20                  | 1.720(13)                             | W2-O27                  | 1.915(12)                             | W2-O28                  | 1.899(11)                             |
| W2-O34                  | 1.892(12)                             | W2-O43                  | 1.937(11)                             | W2-O45                  | 2.285(10)                             |
| W3-O31                  | 1.698(12)                             | W3-O34                  | 1.967(12)                             | W3-O36                  | 1.952(11)                             |
| W3-O38                  | 1.859(11)                             | W3-O40                  | 2.303(11)                             | W3-O41                  | 1.864(10)                             |
| W4-O12                  | 1.707(12)                             | W4-O30                  | 1.898(12)                             | W4-O32                  | 1.873(12)                             |
| W4-O41                  | 1.978(10)                             | W4-O43                  | 1.956(11)                             | W4-O45                  | 2.247(10)                             |
| W5-O26                  | 1.910(12)                             | W5-O33                  | 1.722(11)                             | W5-O36                  | 1.909(11)                             |
| W5-O40                  | 2.307(11)                             | W5-O42                  | 1.937(11)                             | W5-O44                  | 1.870(11)                             |
| W6-O23                  | 1.704(13)                             | W6-O22                  | 1.914(12)                             | W6-O27                  | 1.909(12)                             |
| W6-O35                  | 1.939(12)                             | W6-O39                  | 2.297(11)                             | W6-O42                  | 1.914(12)                             |
| W7-O16                  | 1.727(12)                             | W7-O17                  | 1.782(12)                             | W7-O19                  | 1.888(13)                             |
| W7-O28                  | 2.029(13)                             | W7-O30                  | 2.008(12)                             | W7-O45                  | 2.219(10)                             |
| W8-O15                  | 1.927(13)                             | W8-O21                  | 1.713(12)                             | W8-O26                  | 1.944(12)                             |
| W8-O29                  | 1.863(13)                             | W8-O35                  | 1.977(12)                             | W8-O39                  | 2.237(11)                             |
| W9-O13                  | 1.742(13)                             | W9-O15                  | 1.966(12)                             | W9-O22                  | 2.019(12)                             |
| W9-O19                  | 1.963(13)                             | W9-O24                  | 1.808(13)                             | W9-O39                  | 2.215(10)                             |
| W10-O6                  | 1.849(14)                             | W10-O8                  | 1.894(18)                             | W10-O18                 | 2.093(12)                             |
| W10-O25                 | 2.119(12)                             | W10-O29                 | 1.967(13)                             | W10-O32                 | 2.009(12)                             |
| Co1-O3                  | 2.037(16)                             | Co1-O4                  | 2.101(16)                             | Co1-O5                  | 2.148(17)                             |
| Co1-O17                 | 2.092(12)                             | Co1-O24                 | 2.040(12)                             | Co1-O37                 | 2.071(12)                             |
| Co1-O24                 | 2.040(12)                             | Co1-O17                 | 2.092(12)                             | Bi1-O39                 | 2.127(10)                             |
| Bi1-O40                 | 2.128(11)                             | Bi1-O45                 | 2.143(10)                             | Na1-O20                 | 2.294(15)                             |
| Na1-O31                 | 2.294(15)                             | Na1-O9                  | 2.428(18)                             | Na1-O10                 | 2.410(18)                             |
| Na1-O11                 | 2.477(17)                             | Na1-O1                  | 2.34(3)                               | Na2-O2                  | 2.38(3)                               |
| Na2-O7                  | 2.382(16)                             | Na2-O9                  | 2.451(18)                             | Na2-O10                 | 2.344(16)                             |
| Na2-O11                 | 2.448(17)                             | Na2-O14                 | 2.417(17)                             | N1-C3                   | 1.26(4)                               |
| N1-C1                   | 1.28(4)                               | N2-C2                   | 1.29(4)                               | N2-C1                   | 1.35(4)                               |
| C3-C2                   | 1.33(5)                               | O38-W1-O40              | 71.6(4)                               | O37-W1-O40              | 164.0(5)                              |
| O28-W2-O45              | 72.7(5)                               | O20-W2-O45              | 170.0(5)                              | O38-W3-O40              | 73.1(4)                               |
| O31-W3-O40              | 168.3(5)                              | O30-W4-O45              | 75.2(4)                               | O12-W4-O45              | 173.8(5)                              |
| O44-W5-O40              | 73.8(4)                               | O33-W5-O40              | 170.5(5)                              | O22-W6-O39              | 73.6(4)                               |
| O23-W6-O39              | 171.2(5)                              | O28-W7-O45              | 72.0(4)                               | O16-W7-O45              | 163.0(5)                              |
| O15-W8-O39              | 74.4(4)                               | O21-W8-O39              | 170.9(5)                              | O22-W9-O39              | 73.6(4)                               |
| O13-W9-O39              | 166.7(6)                              | O18-W10-O25             | 81.0(5)                               | O6-W10-O25              | 173.1(7)                              |
| O4-Co1-O5               | 84.9(8)                               | O3-Co1-O24              | 179.1(6)                              | O39-Bi1-O45             | 85.2(4)                               |
| O40-Bi1-O45             | 89.1(4)                               | O10-Na1-O9              | 77.9(6)                               | O20-Na1-O10             | 176.9(6)                              |
| O10-Na2-O9              | 78.7(6)                               | O2-Na2-O11              | 169.9(8)                              | N2-C2-C3                | 106(3)                                |

|          |        |            |          |            |          |
|----------|--------|------------|----------|------------|----------|
| N1-C3-C2 | 111(3) | N1-C1-N2   | 108(3)   | C2-N2-C1   | 107(3)   |
| C3-N1-C1 | 108(3) | W2-O20-Na1 | 170.3(8) | W3-O31-Na1 | 139.1(7) |

---

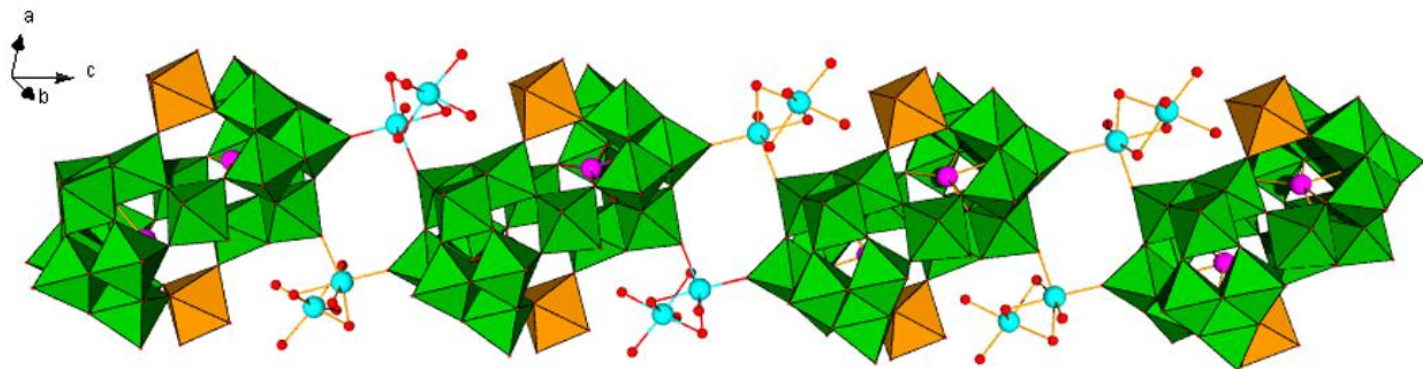

**Figure S1.** 1-D chain of BWCN was made by sandwiched POM units and [Na<sub>2</sub>] linkers (green octahedra, W; yellow octahedra, Co; purple ball, Bi; green ball, Na).

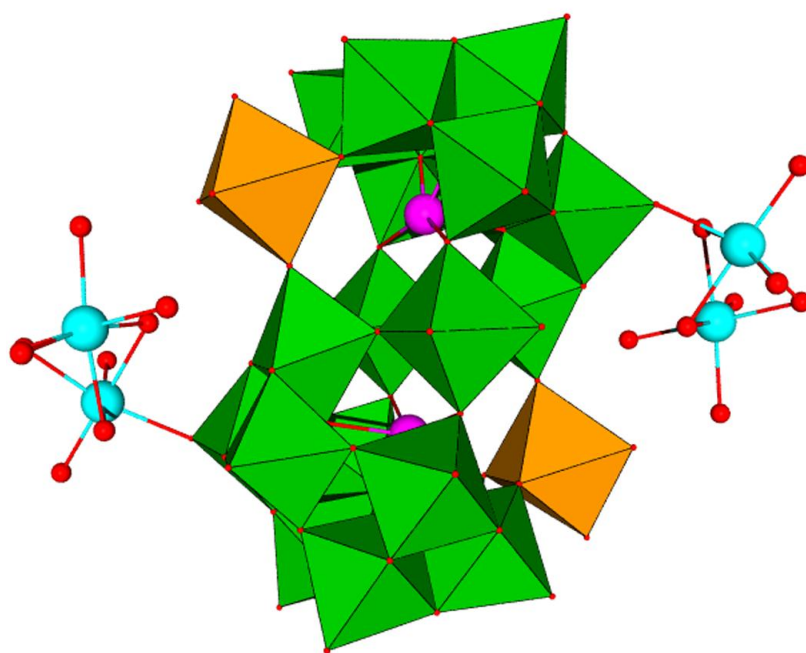

**Figure S2.** View of the molecule structure of compound BWCN. Elements show green octahedra, W, yellow octahedra, Co, purple ball, Bi, and green ball, Na in the picture.

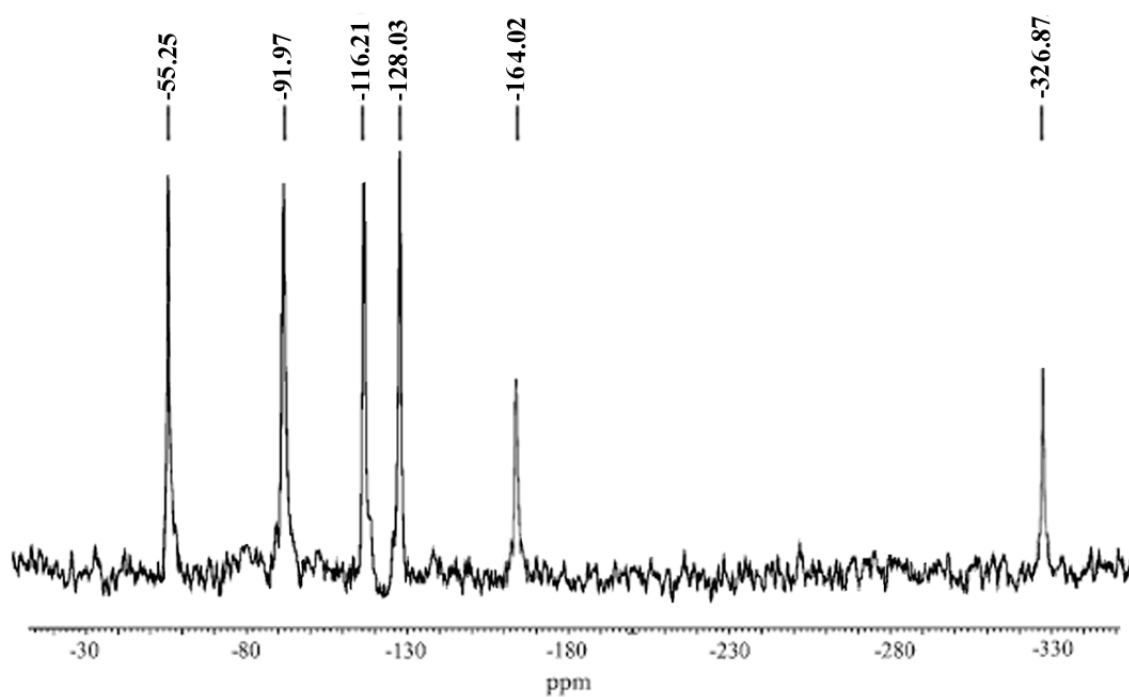

**Figure S3.** Tungsten-183 NMR spectra of compound BWCN at 293 K.

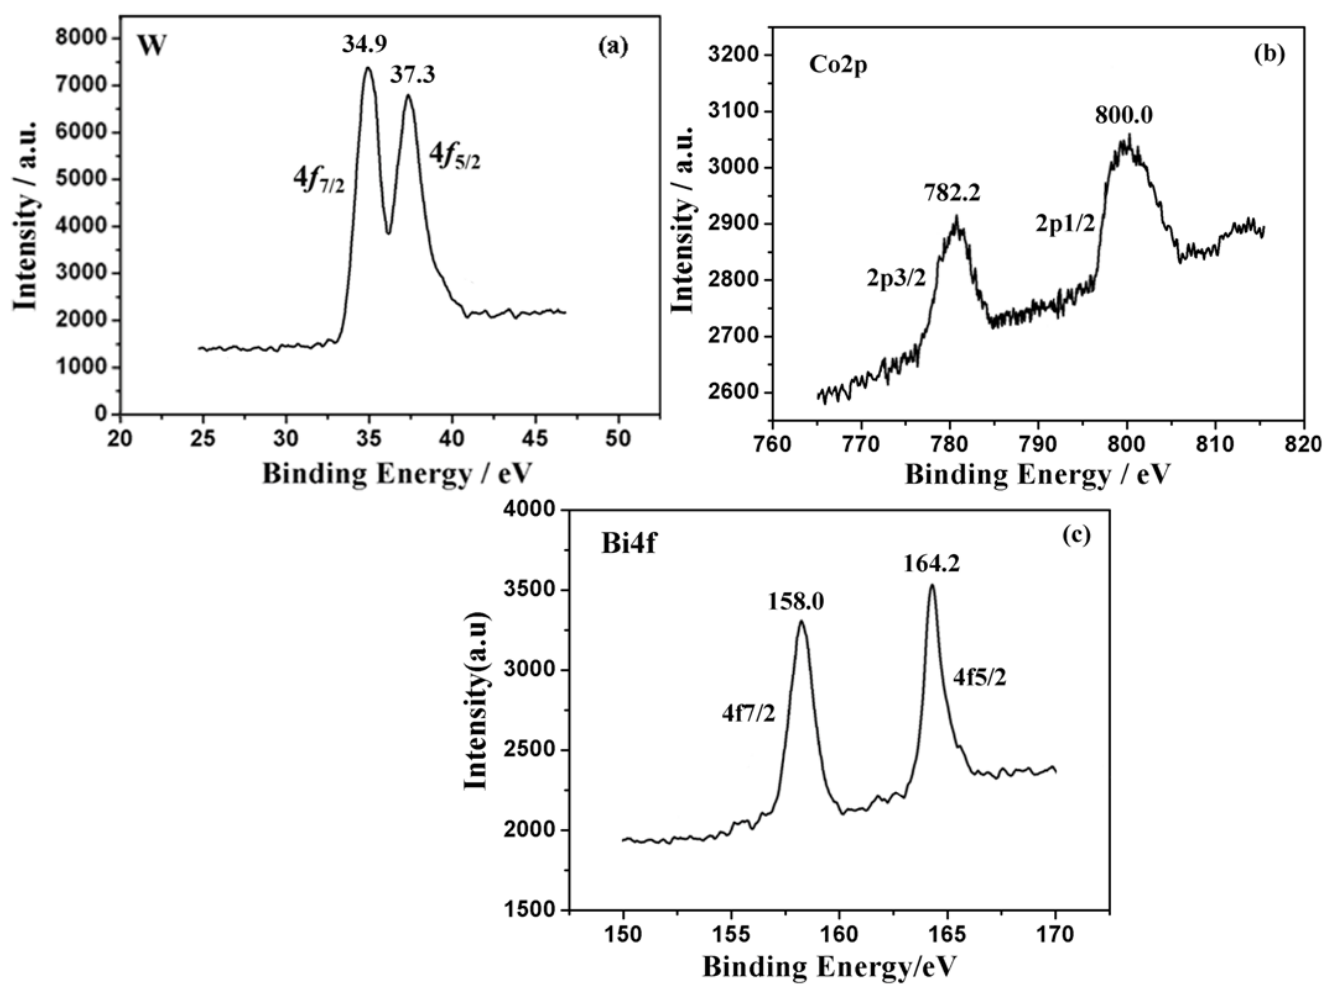

Figure S4. XPS spectra of compound BWCN.

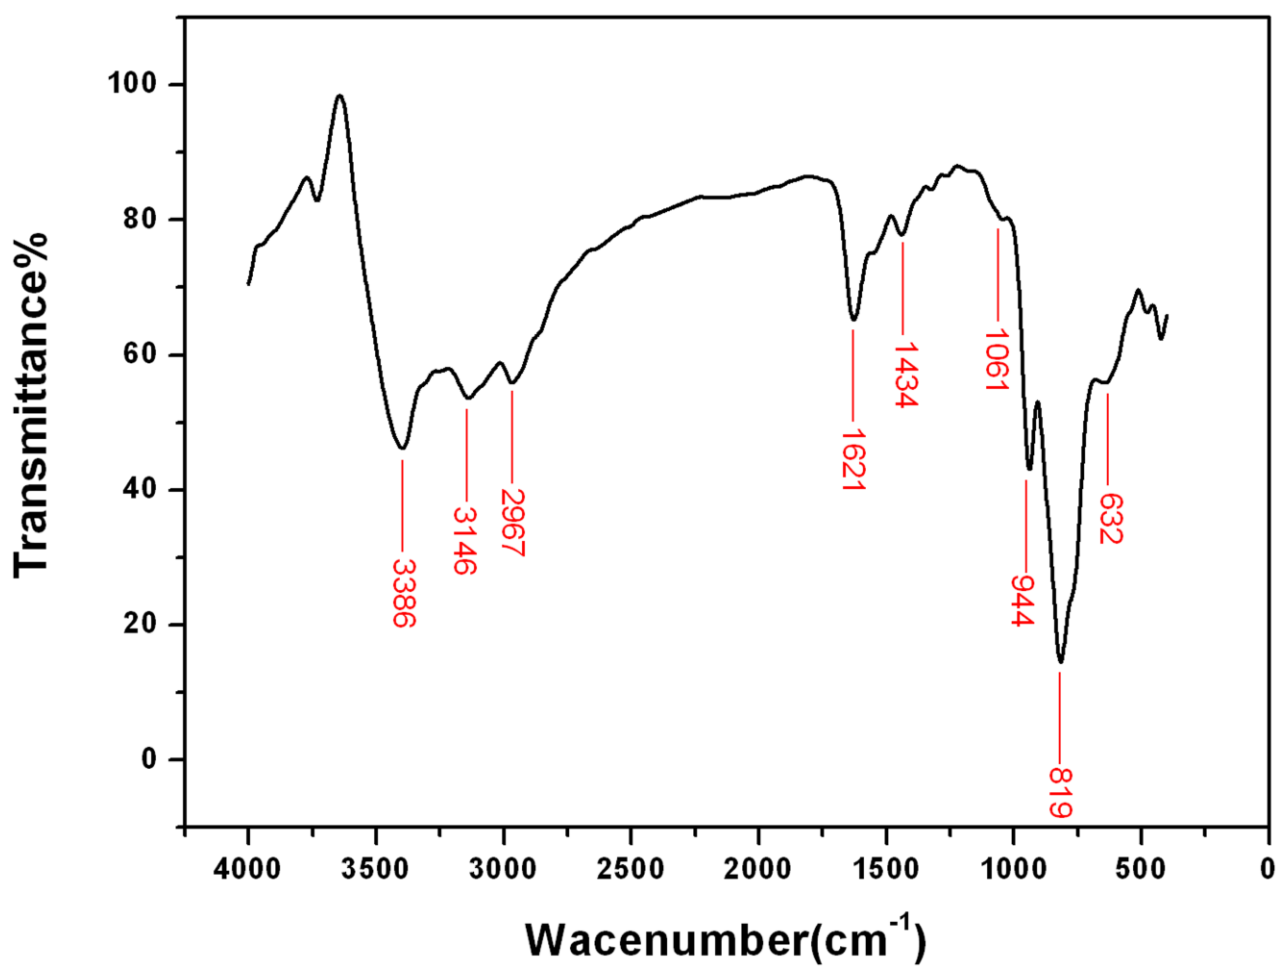

Figure S5. IR spectra of compound BWCN.



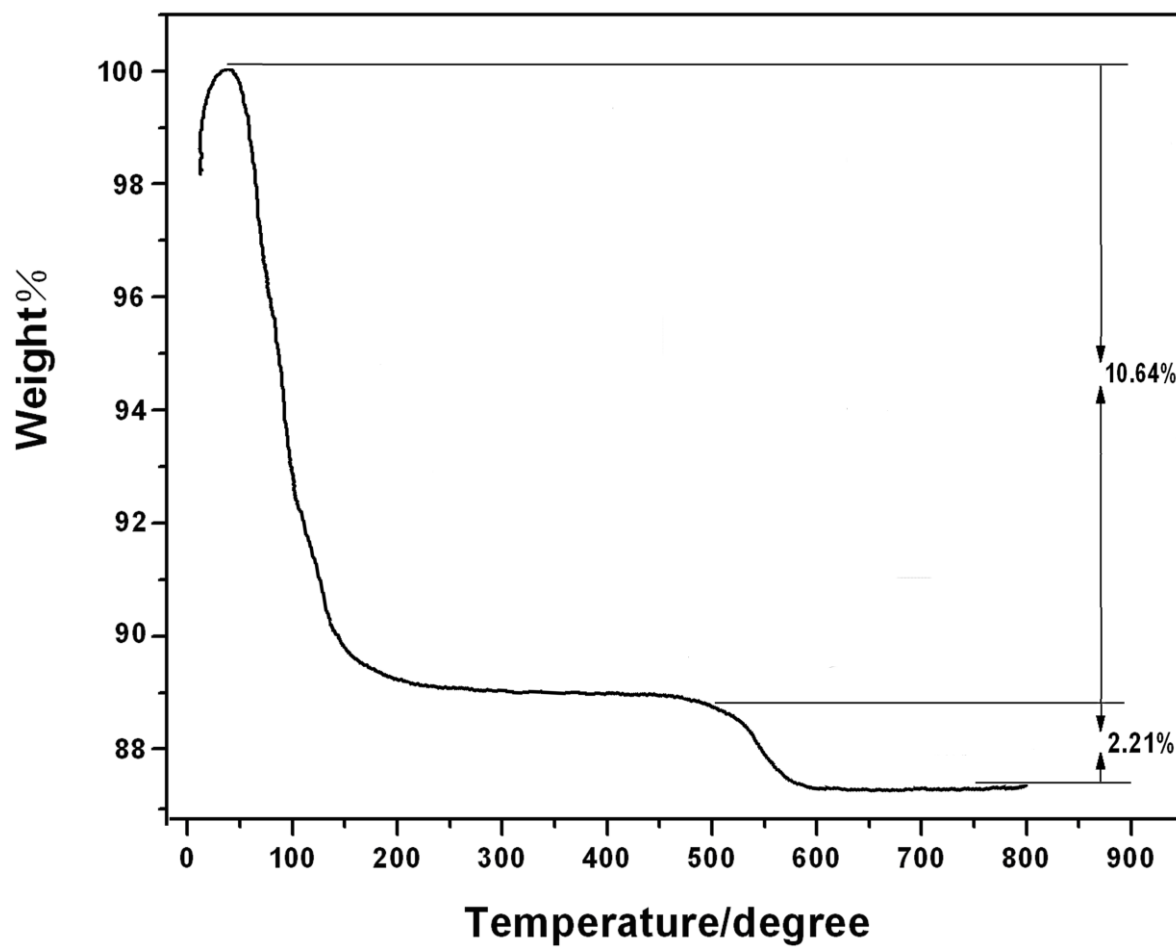

**Figure S6.** TG curve of compound BWCN.

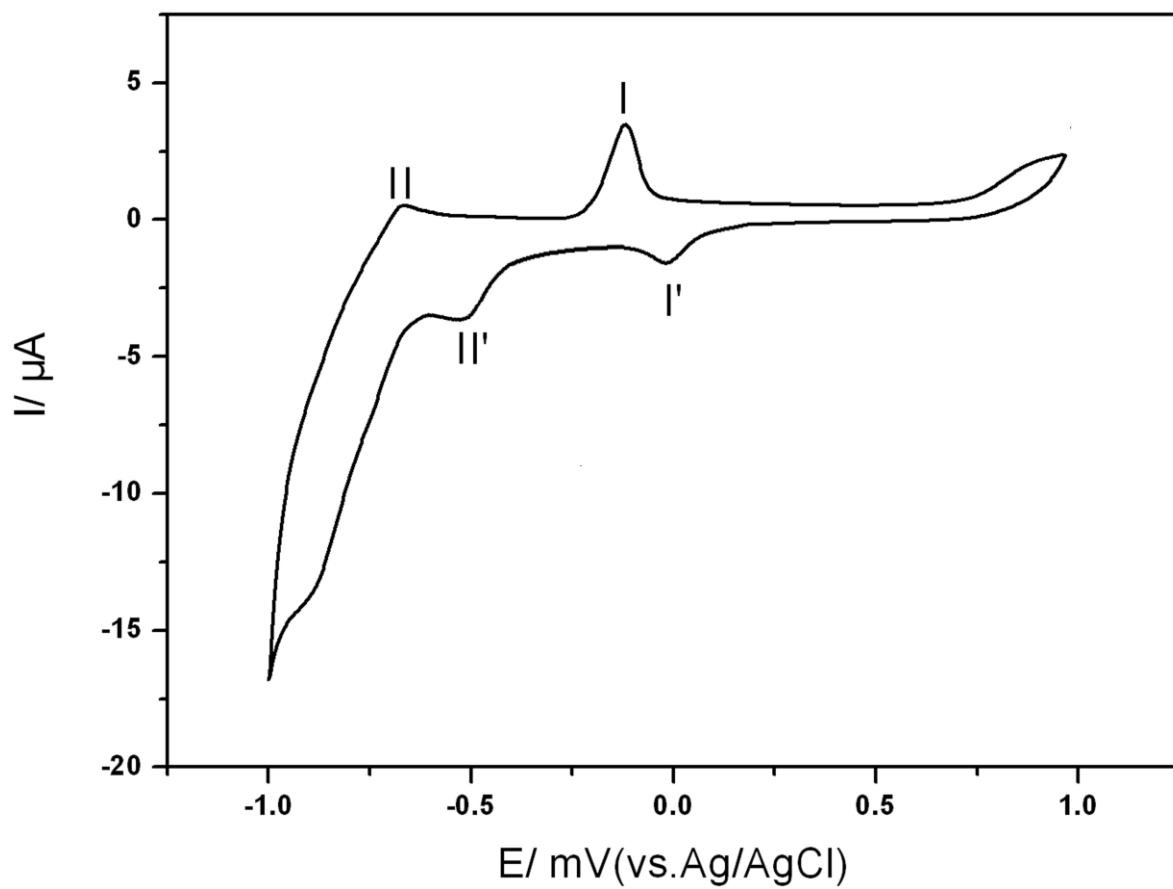

**Figure S7.** Cyclic voltammograms of compound BWCN.

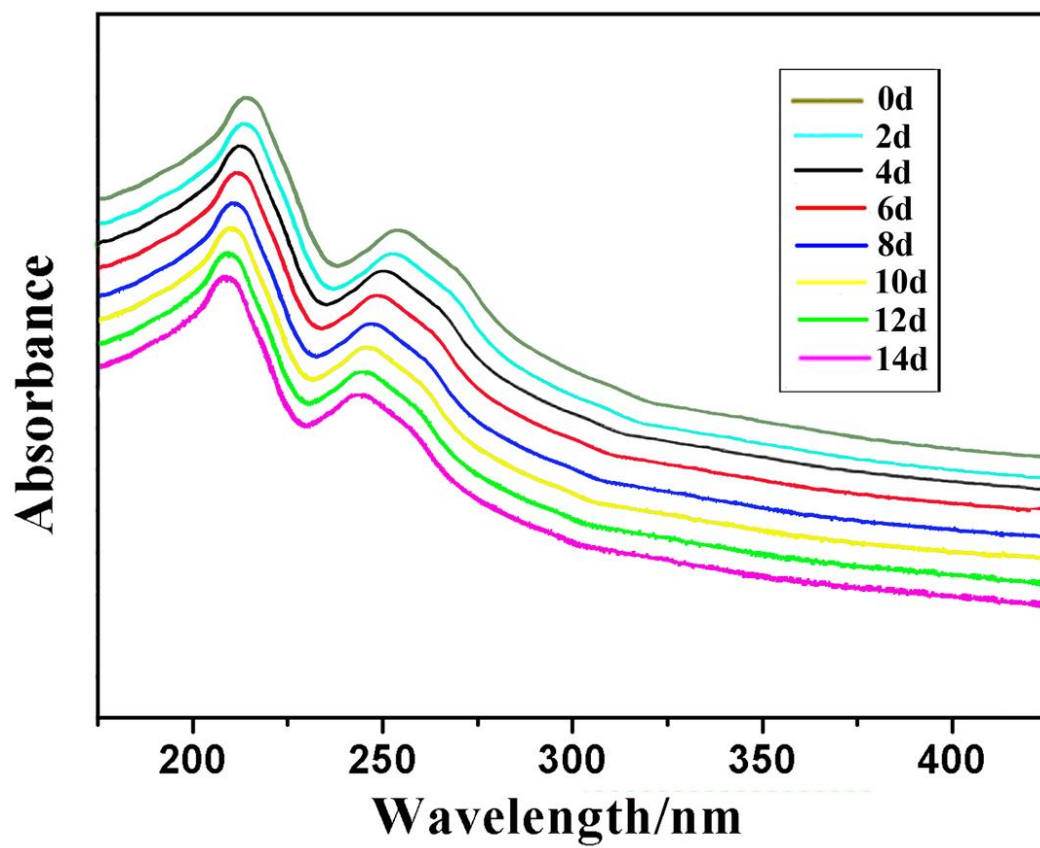

**Figure S8.** The influence of time on the stability of compound BWCN in the aqueous solution.

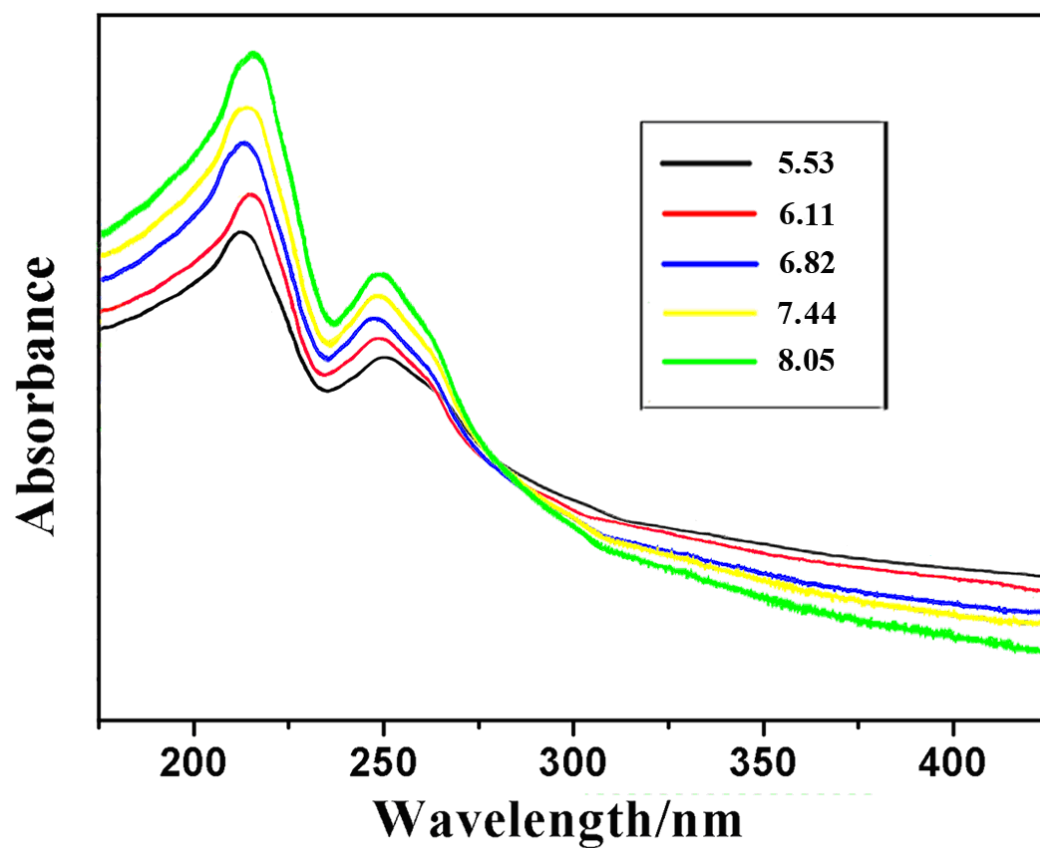

**Figure S9.** The influence of the pH value on the stability of compound BWCN in the aqueous solution. the pH values of the acidic direction and alkaline direction were adjusted using diluted HCl solution and NaOH solution, respectively.
